# Supplementary material for: High Ghrelin Level Predicts the Curve Progression of Adolescent Idiopathic Scoliosis Girls
Source: Biomed Res Int. 2018 Jul 16;2018:9784083. doi: 10.1155/2018/9784083 (PMC6069699; doi:10.1155/2018/9784083)
Supplement: Supplementary Materials — The patient characteristics and biochemical data used to support the findings of this study are included within the supplementary information file. AIS group data were displayed in sheet 1; control group data were displayed in sheet 2. [file 9784083.f1.xlsx]

## Sheet: Sheet1
Patient_AIS	GhrelinAIS	LeptinAIS	RisserAIS	age_AIS	weight_AIS	height_AIS	cBMI_AIS	BMI_AIS	cHeight_AIS	cobb_AIS	menarch_AIS	AIS_YSM
1	14.23	5.55	0	12	40	1.54	16.3	16.9	156.831	25	0
2	13.21	2.23	0	11	35.2	1.5	15.1	15.6	152.761	24	0
3	12.67	5.2	0	9	29.4	1.33	15.9	16.6	135.831	25	0
4	8.3	5.36	1	11	36.9	1.5	15.7	16.4	153.296	31	0
5	5.25	13.42	3	13	44.5	1.55	17.7	18.5	158.648	35	1	0.5
6	10.1	2.42	0	12	41.8	1.55	16.6	17.4	158.648	35	1	0.3
7	6.27	5.13	2	11	36.1	1.5	15.5	16	152.624	22	0
8	9.17	2.02	0	12	38.9	1.55	15.3	16.2	159.467	43	0
9	7.35	4.57	2	13	45.1	1.54	18.2	19	157.556	34	1	0.5
10	9	5.55	2	14	45.32	1.6	16.7	17.7	164.943	47	1	1
11	8.7	2.6	0	10	30.15	1.41	14.6	15.2	143.559	21	0
12	8.5	2.52	1	10	28.16	1.41	13.7	14.2	143.432	19	0
13	2.8	10	4	12	38.56	1.52	16	16.7	155.381	32	0
14	8.24	5.13	3	14	46.94	1.54	19.1	19.8	156.831	25	1	0.6
15	8.16	4.69	2	12	41	1.51	17.3	18	153.761	24	0
16	8	2.69	1	10	33	1.42	15.7	16.4	144.831	25	0
17	4.46	8.85	4	15	50	1.58	16.7	20	173.066	91	1	1.5
18	7.76	9.57	2	11	35	1.48	15.3	16	151.055	28	0
19	7.7	4.96	1	12	38	1.53	15.6	16.2	155.831	25	0
20	7.55	8.05	5	15	45	1.61	16.9	17.4	163.312	17	1	1.2
21	9.1	7.32	0	11	33	1.45	15.2	15.7	147.495	20	0
22	7.26	4.35	1	11	31	1.45	13.9	14.7	149.246	41	0
23	7.19	7.44	2	13	40	1.5	17.3	17.8	152.254	16	0
24	7.13	6.63	2	12	35	1.5	15	15.6	152.761	24	0
25	7.1	7.35	3	14	44	1.54	17.3	18.6	159.47	51	1	0.8
26	6.71	3.33	3	13	40	1.49	17.2	18	152.381	32	0
27	6.67	10.85	1	12	37	1.5	15.7	16.4	153.381	32	0
28	6.51	6	4	14	43	1.52	17.9	18.6	154.979	27	1	1.1
29	9.23	1.68	0	12	37	1.5	15.9	16.4	152.432	19	1	0.4
30	6.18	5.67	1	10	30	1.35	15.9	16.5	137.312	17	0
31	6.05	10.75	3	11	40	1.38	20.3	21	140.495	20	0
32	5.32	6.45	5	15	45	1.58	16.8	18	163.47	51	1	1.7
33	10.3	1.68	0	9	30	1.35	15.9	16.5	137.495	20	0
34	4.97	3.8	3	13	40	1.54	16.3	16.9	156.692	23	1	0.6
35	4.89	10.54	4	13	42	1.58	16.2	16.8	160.831	25	0
36	4.83	7.35	3	12	36	1.57	14.2	14.6	159.254	16	0
37	4.43	4.51	1	12	45	1.55	18.2	18.7	157.312	17	1	0.4
38	3.93	5.65	3	12	44	1.6	16.7	17.2	162.432	19	0
39	7.79	13.03	1	14	50	1.64	17.7	18.6	167.936	38	0
40	11.27	12.75	0	11	43	1.6	16.3	16.8	162.432	19	0
41	12.12	2.6	1	13	49	1.57	19.3	19.9	159.432	19	1	0.5
42	10.12	2.89	0	12	42	1.55	17	17.5	157.312	17	0
43	9.78	8.47	1	14	47	1.6	17.8	18.4	162.371	18	1	0.7
44	9	9.05	1	15	47	1.62	17.4	17.9	164.198	15	1	1
45	8.87	4.7	0	11	35	1.48	15.5	16	150.495	20	0
46	8.5	10.1	0	10	33	1.44	15.4	15.9	146.432	19	0
47	2.97	7.45	5	15	51	1.65	18.2	18.7	167.559	21	1	0.9
48	8.25	7	0	9	31	1.37	15.9	16.5	139.831	25	0
49	7.94	11.29	3	13	43	1.59	16.4	17	161.904	26	1	0.3
50	7.73	4.69	0	10	33	1.43	15.5	16.1	145.761	24	0
51	7.66	3.76	2	11	32	1.4	15.5	16.3	143.648	35	0
52	3.32	12.48	5	16	49	1.62	17.9	18.7	165.648	35	1	2.1
53	7.26	1.99	3	14	50	1.6	18.6	19.5	163.936	38	1	1.5
54	7.26	4.75	2	14	44	1.59	16.8	17.4	162.055	28	1	1.1
55	3.74	8.77	5	15	44.5	1.57	17.3	18.1	160.214	30	1	1.8
56	6.72	6.23	4	15	49.5	1.63	18	18.6	165.904	26	1	0.8
57	6.7	2.88	3	14	42.7	1.53	17.5	18.2	156.214	30	1	0.4
58	6.54	3.69	2	13	44.5	1.57	17.5	18.1	159.254	16	1	0.8
59	4.53	6.56	5	16	52.3	1.7	17.6	18.1	172.198	15	1	1.5
60	6.3	5.78	1	11	38.2	1.44	17.9	18.4	146.254	16	0
61	6.27	11.48	5	15	52	1.63	19	19.6	165.624	22	1	1.9
62	6.23	6.98	2	11	33.5	1.4	16.5	17.1	142.495	20	0
63	6.18	5.74	0	10	34	1.38	17.2	17.9	140.624	22	0
64	6.15	3.95	0	9	33	1.34	17.6	18.4	136.761	24	0
65	6.11	6.13	3	12	41	1.55	16.6	17.1	157.371	18	1	0.2
66	5.89	5.67	2	12	44	1.57	17.3	17.9	159.432	19	0
67	5.8	8.05	4	13	42.7	1.58	16.4	17.1	161.133	29	0
68	5.57	9.02	5	14	47.2	1.63	17.1	17.8	165.979	27	1	0.4
69	5.5	8.23	1	10	33.3	1.4	16.3	17	143.055	28	0
70	5.49	3.22	0	10	36.8	1.45	16.7	17.5	148.296	31	0
71	5.47	5.7	2	14	39.7	1.54	16.1	16.7	157.214	30	1	0.7
72	5.36	6	4	14	45.6	1.64	16.4	17	166.559	21	1	1.2
73	5.27	7.33	4	14	51.2	1.58	19.9	20.5	160.495	20	1	1
74	5.26	13.03	4	15	54.6	1.63	20	20.6	165.143	14	1	1.6
75	5.23	10.2	1	12	41.9	1.5	18.1	18.6	152.198	15	1	0.2
76	5.05	6.35	2	13	44.6	1.62	16.5	17	164.254	16	1	0.5
77	5	7.4	0	9	33	1.42	15.8	16.4	144.312	17	0
78	5	8.93	5	16	55	1.71	18.3	18.8	173.371	18	1	2.8
79	4.97	6.35	0	10	31.7	1.34	17	17.7	136.432	19	0
80	4.96	2.95	1	10	33	1.39	16.6	17.1	141.089	13	0
81	4.89	6.13	2	13	44.8	1.57	17.7	18.2	159.037	12	0
82	4.89	6.5	5	15	44.8	1.64	16.2	16.7	166.198	15	1	1.3
83	4.88	9.46	2	14	49	1.65	17.5	18	167.143	14	1	0.3
84	4.78	3.95	1	13	46	1.62	17	17.5	164.559	21	1	0.5
85	4.7	5.55	1	13	42	1.55	16.9	17.5	157.624	22	1	0.3
86	6.48	8.96	0	10	42.2	1.45	19.3	20.1	147.831	25	0
87	4.16	5.1	2	13	40.6	1.47	18	18.8	150.133	29	1	0.8
88	4.08	5.25	4	14	39.5	1.52	16.4	17.1	154.979	27	1	0.9
89	4.02	6.41	5	17	48	1.65	17.1	17.6	167.761	24	1	1.8
90	7.15	3.86	0	9	35	1.37	18	18.6	139.495	20	0
91	3.69	9.57	0	10	33	1.46	14.9	15.5	148.692	23	0
92	3.63	6.63	0	11	34	1.41	16.5	17.1	143.624	22	0
93	3.6	9.56	0	10	32.7	1.4	15.9	16.7	143.214	30	0
94	7.46	8.77	1	12	38.6	1.5	16.4	17.2	153.648	35	1	0.4
95	3.31	1.47	0	11	38	1.49	16.5	17.1	151.559	21	0
96	3.25	9.8	3	13	43.2	1.5	18.6	19.2	152.432	19	1	0.5
97	3.22	8.65	2	14	36.2	1.49	15.8	16.3	151.143	14	1	0.3
98	3.01	5.13	4	14	35.7	1.48	15.9	16.3	149.986	11	1	0.7
99	3	11.32	5	14	40	1.4	19.8	20.4	142.037	12	1	0.4
100	8.4	3.63	0	12	40	1.42	19.3	19.8	143.986	11	1	0.3
101	2.79	4.79	2	12	37.8	1.44	17.6	18.2	146.432	19	0
102	2.76	7.04	1	11	32.7	1.4	16.1	16.7	142.495	20	0
103	2.45	8.47	5	15	44	1.52	18.4	19	154.761	24	1	1
104	2.15	6.75	4	14	45	1.58	17.5	18	160.371	18	1	1
105	1.3	9.62	4	14	44	1.56	17.6	18.1	158.312	17	1	1.1

## Sheet: Sheet2
Control_No.	ghrelin_Control	leptin_Control	risser_Control	age_Control	weight_Control	height_Control	BMI_Control	menarch_Control	YSM_year__Control
1	4.03	1.58	0	10	34	1.42	16.9	0
2	2.71	2.11	3	15	51	1.6	19.9	1	1.1
3	2.96	3.38	4	11	36	1.48	16.4	0
4	5.98	3.85	4	12	37	1.5	16.4	0
5	3.6	3.9	2	15	48	1.62	18.3	1	0.5
6	4.55	4.48	3	12	33	1.44	15.9	1	0.3
7	4.15	4.5	4	11	31	1.45	14.7	0
8	3.16	5.18	3	13	40	1.5	17.8	0
9	6.16	5.23	4	12	35	1.5	15.6	1	0.5
10	6.46	5.34	5	14	44	1.54	18.6	1	1
11	1.74	5.57	3	13	46	1.54	19.4	0
12	1.49	6.2	2	13	60	1.72	20.3	0
13	10.11	6.68	2	14	50	1.6	19.5	1	0.4
14	4.18	6.72	3	13	50	1.62	19.1	1	0.6
15	2.05	6.85	0	12	40	1.5	17.8	0
16	8.31	7.24	1	12	44	1.54	18.6	0
17	4.1	7.43	1	12	48	1.52	20.8	1	1.5
18	3.99	7.53	4	13	40	1.53	17.1	1	0.2
19	2.74	7.88	3	14	46	1.55	19.1	1	1.3
20	3.66	8.31	4	13	44	1.58	17.6	1	1.2
21	3.7	8.7	1	12	39	1.47	18	0
22	5.75	8.74	2	13	41	1.53	17.5	0
23	8.32	8.82	5	16	49	1.6	19.1	1	2.2
24	6.08	9.06	5	15	48	1.57	19.5	1	1.5
25	6.67	9.21	0	12	41	1.53	17.5	1	0.8
26	5.01	9.27	3	12	40	1.52	17.3	0
27	2.34	9.38	5	13	43	1.5	19.1	0
28	2.48	9.5	0	12	41	1.49	18.5	1	1.1
29	4.44	9.61	2	13	47	1.51	20.6	1	0.4
30	4.32	9.8	0	11	38	1.45	18.1	0
31	7.96	10.23	1	12	40	1.48	18.3	0
32	2.97	10.3	0	12	41	1.47	19	1	1.7
33	1.43	10.54	0	12	44	1.52	19	0
34	3.84	11.14	1	13	43	1.55	17.9	1	0.6
35	1.93	11.54	1	13	42	1.52	18.2	0
36	3.5	11.87	2	14	46	1.58	18.4	1	0.1
37	5.65	12.14	1	13	40	1.5	17.8	1	0.4
38	6.21	12.32	3	13	41	1.55	17.1	0
39	4.93	13.08	4	14	50	1.6	19.5	1	0.7
40	4.56	15.31	3	13	40	1.56	16.4	0
